# Supplementary material
Source: PubMed Central journal article supplement (PMC10233311)
Supplement: supplementary_material_2_04022022_bbac191.pdf [file supplementary_material_2_04022022_bbac191.pdf]

**Supplementary material 2:**

Literature selection workflow, and online information associated with methodology.

**Manuscript title:**

Artificial intelligence & machine learning approaches using gene expression and variant data for personalized medicine

**Authors**

Sreya Vadapalli<sup>1, †</sup>, Habiba Abdelhalim<sup>1, †</sup>, Saman Zeeshan<sup>2</sup>, and Zeeshan Ahmed<sup>1, 3, \*</sup>

**Affiliations**

1. Rutgers Institute for Health, Health Care Policy and Aging Research, Rutgers University, 112 Paterson St, New Brunswick, NJ, USA.
2. Rutgers Cancer Institute of New Jersey, Rutgers University, 195 Little Albany St, New Brunswick, NJ, USA.
3. Department of Medicine, Robert Wood Johnson Medical School, Rutgers Biomedical and Health Sciences, 125 Paterson St, New Brunswick, NJ, USA.

<sup>†</sup>Equally contributing first authors.

\*Corresponding author(s): Zeeshan Ahmed ([zahmed@ifh.rutgers.edu](mailto:zahmed@ifh.rutgers.edu))

| #  | PMID           | Web link / GitHub                                                                                                                                                                                                   | Last accessed date            |
|----|----------------|---------------------------------------------------------------------------------------------------------------------------------------------------------------------------------------------------------------------|-------------------------------|
| 1  | PMID:28795970  | <a href="http://links.lww.com/IBD/B613">http://links.lww.com/IBD/B613</a>                                                                                                                                           | March 30 <sup>th</sup> , 2022 |
| 2  | PMID: 31270349 | <a href="https://doi.org/10.1038/s41598-019-45989-0">https://doi.org/10.1038/s41598-019-45989-0</a> .                                                                                                               | March 30 <sup>th</sup> , 2022 |
| 3  | PMID: 28269885 | N/A                                                                                                                                                                                                                 | March 30 <sup>th</sup> , 2022 |
| 4  | PMID: 31564248 | <a href="https://genomemedicine.biomedcentral.com/articles/10.1186/s13073-019-0670-6#additional-information">https://genomemedicine.biomedcentral.com/articles/10.1186/s13073-019-0670-6#additional-information</a> | March 30 <sup>th</sup> , 2022 |
| 5  | PMID: 30204480 | Web link not provided; Appendix contains methodology                                                                                                                                                                | March 30 <sup>th</sup> , 2022 |
| 6  | PMID: 31200905 | Web link not provided; Appendix contains methodology                                                                                                                                                                | March 30 <sup>th</sup> , 2022 |
| 7  | PMID: 27587275 | N/A                                                                                                                                                                                                                 | March 30 <sup>th</sup> , 2022 |
| 8  | PMID: 34332931 | <a href="https://github.com/AxelitoMartin/OncoCast">https://github.com/AxelitoMartin/OncoCast</a>                                                                                                                   | March 30 <sup>th</sup> , 2022 |
| 9  | PMID: 29298978 | <a href="https://merge.cs.washington.edu">https://merge.cs.washington.edu</a>                                                                                                                                       | March 30 <sup>th</sup> , 2022 |
| 10 | PMID: 32318621 | trc212013-sup-0001-SupMat.zip                                                                                                                                                                                       | March 30 <sup>th</sup> , 2022 |
| 11 | PMID: 34220416 | <a href="https://www.frontiersin.org/articles/10.3389/fnins.2021.645998/full#supplementary-material">https://www.frontiersin.org/articles/10.3389/fnins.2021.645998/full#supplementary-material</a>                 | March 30 <sup>th</sup> , 2022 |
| 12 | PMID: 33099536 | N/A                                                                                                                                                                                                                 | March 30 <sup>th</sup> , 2022 |
| 13 | PMID: 33645908 | ajmgb32839-sup-0001-Supinfo.docx                                                                                                                                                                                    | March 30 <sup>th</sup> , 2022 |
| 14 | PMID: 29704323 | N/A                                                                                                                                                                                                                 | March 30 <sup>th</sup> , 2022 |
| 15 | PMID: 32111185 | <a href="https://doi.org/10.1186/s12888-020-02503-5">https://doi.org/10.1186/s12888-020-02503-5</a>                                                                                                                 | March 30 <sup>th</sup> , 2022 |
| 16 | PMID: 34199109 | <a href="https://www.mdpi.com/article/10.3390/jpm11070609/s1">https://www.mdpi.com/article/10.3390/jpm11070609/s1</a>                                                                                               | March 30 <sup>th</sup> , 2022 |
| 17 | PMID: 33109206 | <a href="https://doi.org/10.1186/s12920-020-00813-x">https://doi.org/10.1186/s12920-020-00813-x</a>                                                                                                                 | March 30 <sup>th</sup> , 2022 |
| 18 | PMID: 27980626 | <a href="https://bmccgenet.biomedcentral.com/articles/supplements/volume-17-supplement-2">https://bmccgenet.biomedcentral.com/articles/supplements/volume-17-supplement-2</a>                                       | March 30 <sup>th</sup> , 2022 |
| 19 | PMID: 30462833 | N/A                                                                                                                                                                                                                 | March 30 <sup>th</sup> , 2022 |
| 20 | PMID: 33999966 | <a href="https://doi.org/10.1371/journal.pone.0251800.s002">https://doi.org/10.1371/journal.pone.0251800.s002</a>                                                                                                   | March 30 <sup>th</sup> , 2022 |
| 21 | PMID: 33570011 | N/A                                                                                                                                                                                                                 | March 30 <sup>th</sup> , 2022 |
| 22 | PMID: 34054599 | N/A                                                                                                                                                                                                                 | March 30 <sup>th</sup> , 2022 |
| 23 | PMID: 33681364 | Web link not provided; Appendix contains methodology                                                                                                                                                                | March 30 <sup>th</sup> , 2022 |

|    |                |                                                                         |                               |
|----|----------------|-------------------------------------------------------------------------|-------------------------------|
| 24 | PMID: 34343245 | <a href="https://academic.oup.com/bib">https://academic.oup.com/bib</a> | March 30 <sup>th</sup> , 2022 |
|----|----------------|-------------------------------------------------------------------------|-------------------------------|

**Supplementary Table 2.1: Web / GitHub links associated with methodology.** These links were acquired from the supplementary section of the 24 journal articles. Where applicable, a web link was provided. However, N/A was added for articles that did not provide an article. Table 1 contains the Article number, PMID number, Web / GitHub link, and last accessed date.

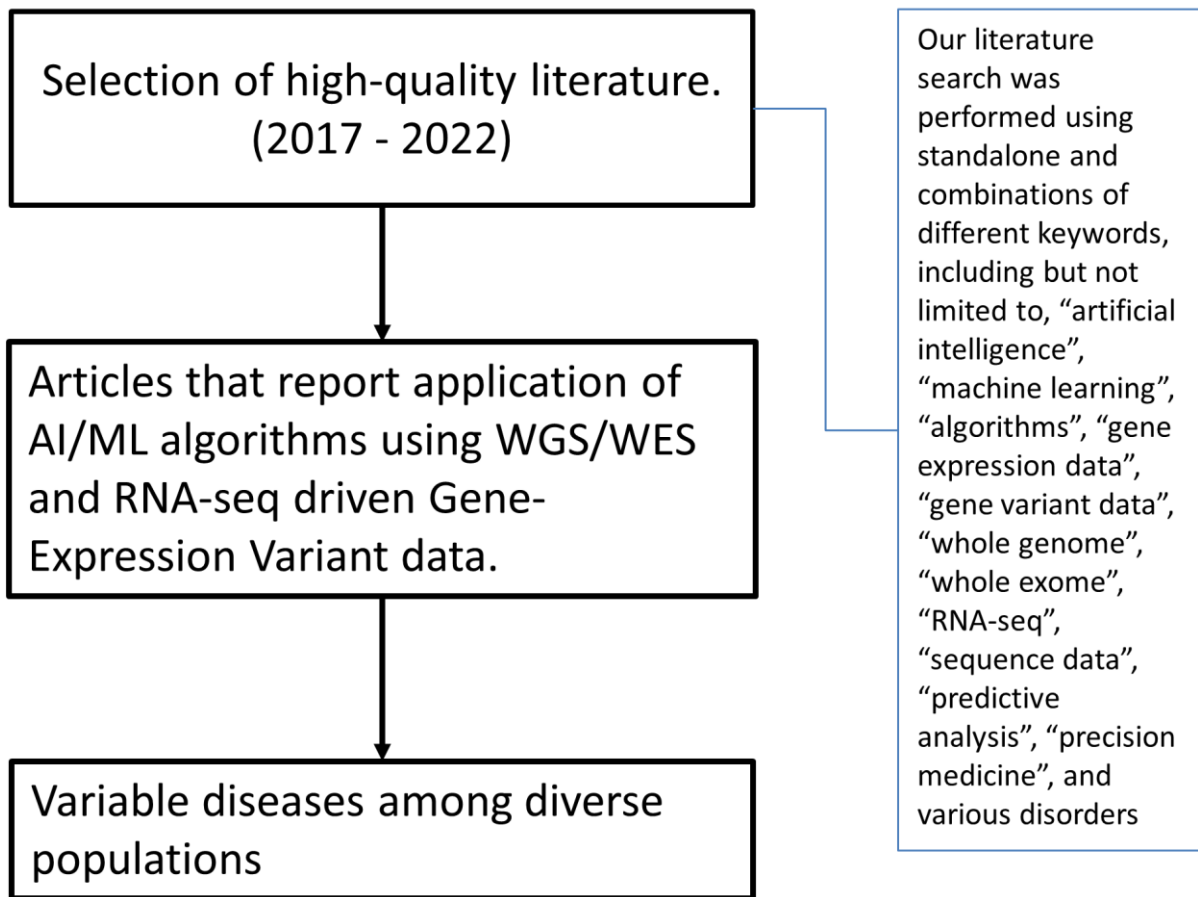

Supplementary Figure 2.1: Selection criteria.

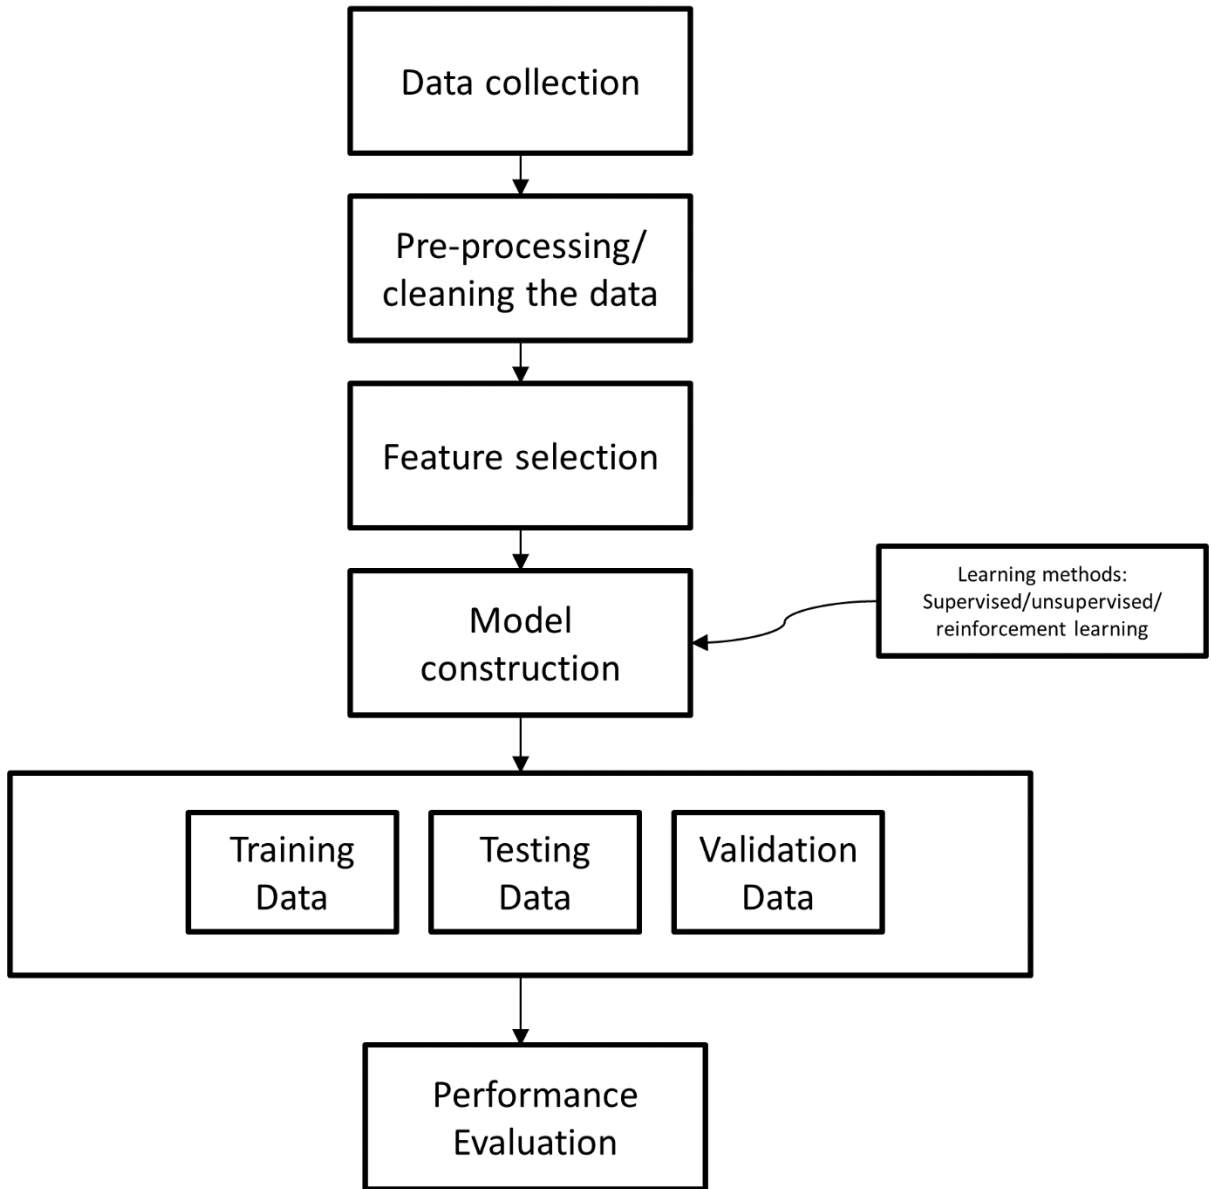

**Supplementary Figure 2.1:** Machine learning Workflow/ flowchart.
